# Supplementary material
Source: PubMed Central journal article supplement (PMC6425102)

1.7x10<sup>5</sup> 9.5x10<sup>7</sup> 5.3x10<sup>10</sup>

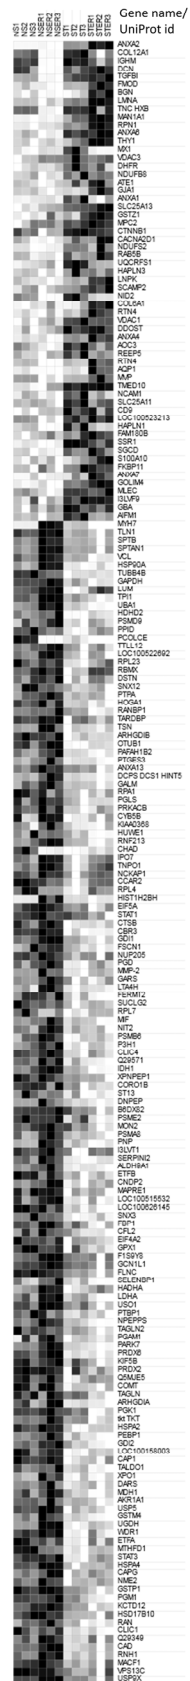



1.7x10<sup>5</sup> 9.5x10<sup>7</sup> 5.3x10<sup>10</sup>

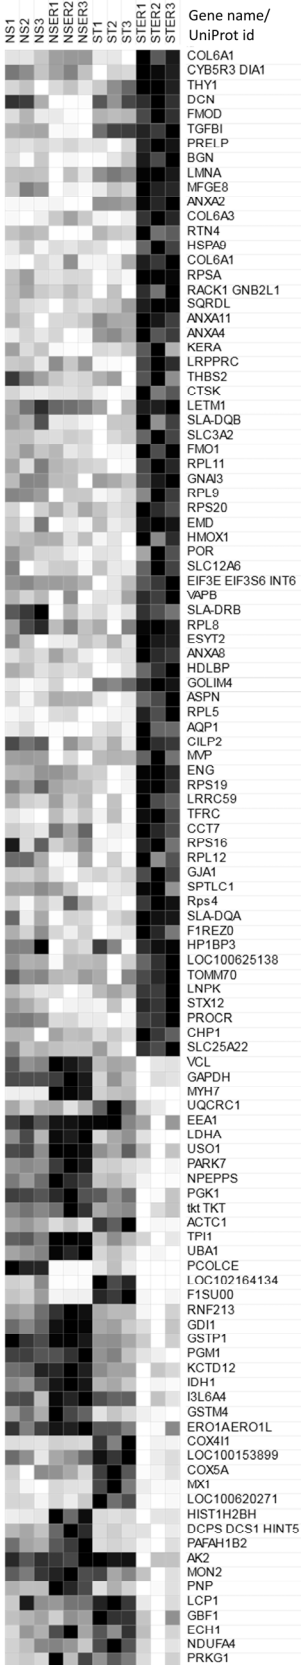

Supplement: Supplemental_Material.pdf [file Supplemental_Material.pdf]
